# Supplementary material
Source: PubMed Central journal article supplement (PMC141015)

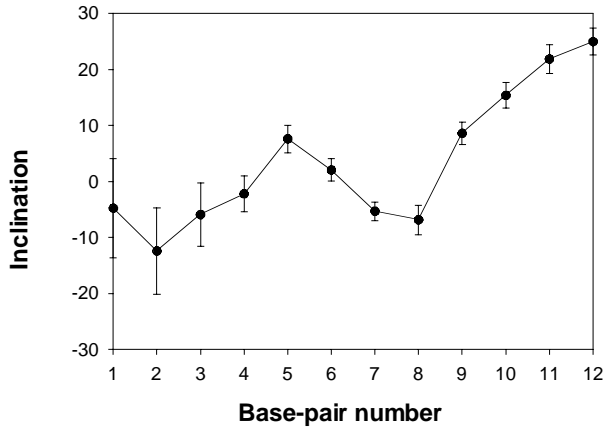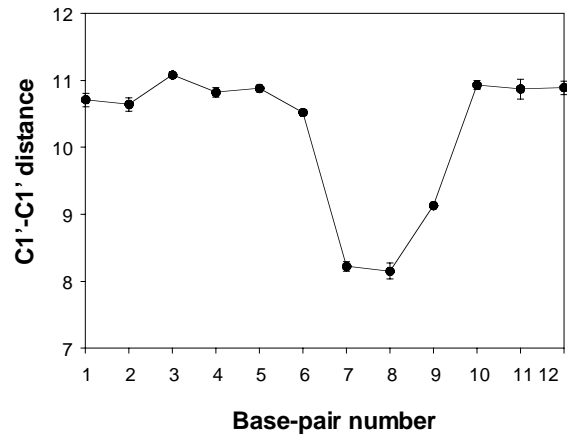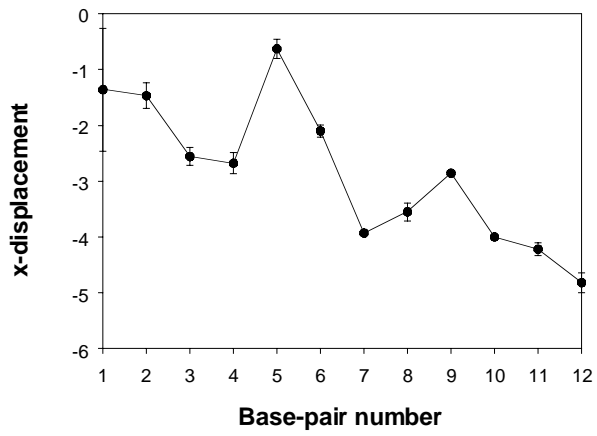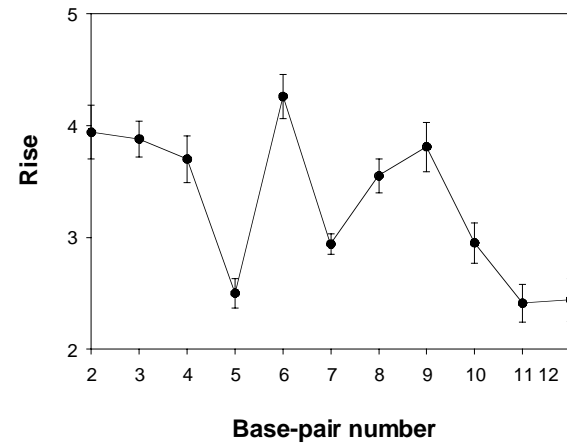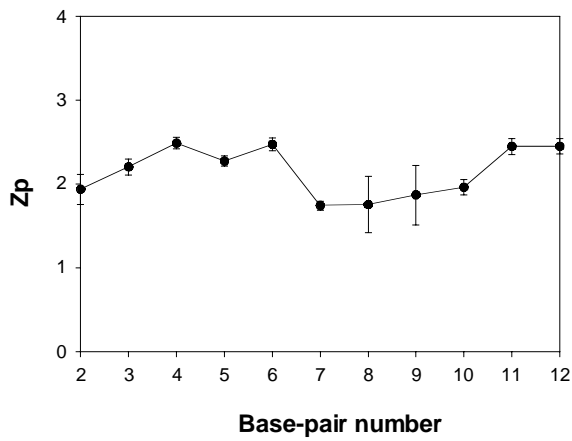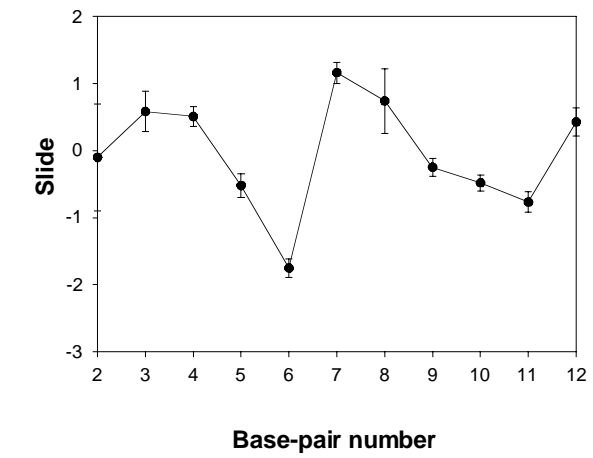

Supplement: pnas_242720799_2.pdf [file pnas_242720799_2.pdf]

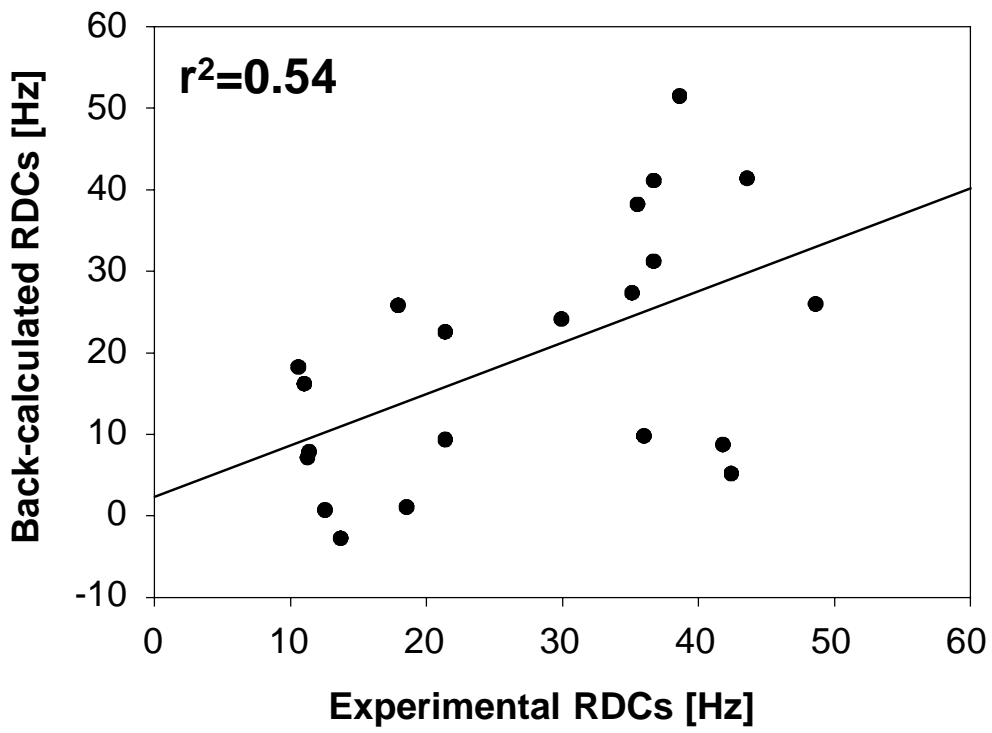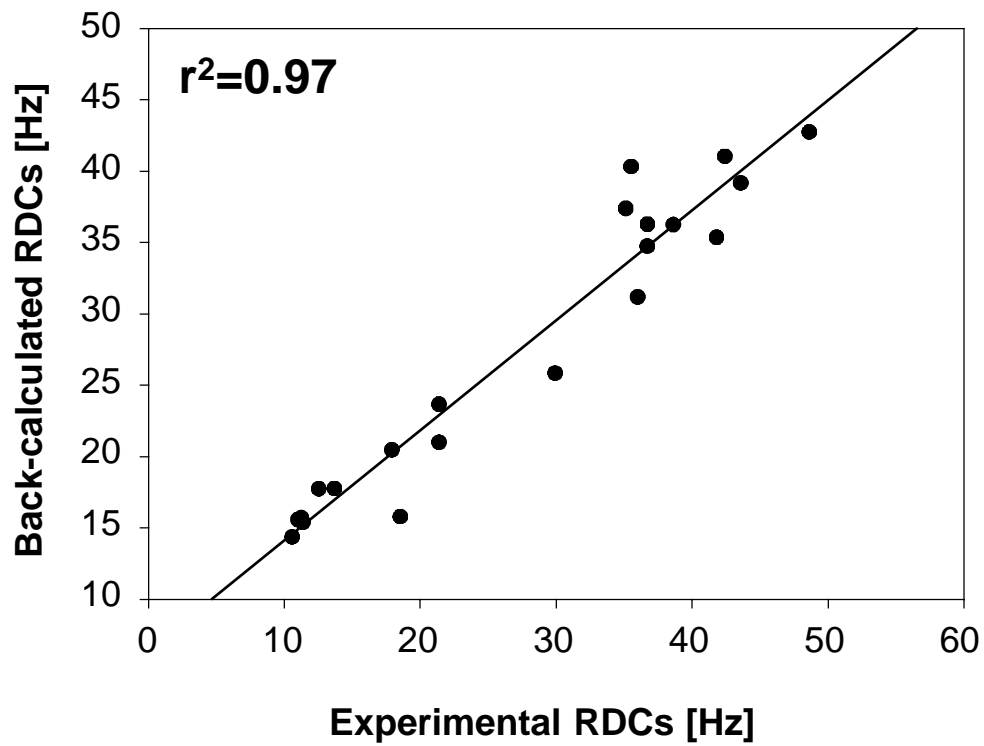

Supplement: pnas_242720799_4.pdf [file pnas_242720799_4.pdf]
